# Supplementary material for: Aegean-style extensional deformation in the contractional southern Dinarides: incipient normal fault scarps in Montenegro
Source: Copernicus journal article supplement (doi:10.5194/se-13-957-2022), 2022-06-03
Supplement: Supplementary file 1 [file se-13-957-2022-supplement.zip]

Archive with 3 entries (3 files):
- Supplementary_V3.pdf
- se-13-957-2022-supplement-title-page.pdf
- Tables_S11_S12_S13.xlsx
