# Supplementary material for: Aegean-style extensional deformation in the contractional southern Dinarides: incipient normal fault scarps in Montenegro
Source: Copernicus journal article supplement (doi:10.5194/se-13-957-2022), 2022-06-03
Supplement: Supplementary file 1 [file se-13-957-2022-supplement.zip › se-13-957-2022-supplement-title-page.pdf]

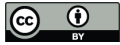

*Supplement of*

## **Aegean-style extensional deformation in the contractional southern Dinarides: incipient normal fault scarps in Montenegro**

**Peter Biermanns et al.**

*Correspondence to:* Peter Biermanns ([p.biermanns@nug.rwth-aachen.de](mailto:p.biermanns@nug.rwth-aachen.de))

- [se-13-957-2022-supplement-title-page.pdf](#)
- [Supplementary\\_V3.pdf](#)
- [Tables\\_S11\\_S12\\_S13.xlsx](#)

The copyright of individual parts of the supplement might differ from the article licence.
