# Supplementary material for: Aegean-style extensional deformation in the contractional southern Dinarides: incipient normal fault scarps in Montenegro
Source: Copernicus journal article supplement (doi:10.5194/se-13-957-2022), 2022-06-03
Supplement: Supplementary file 1 [file Tables_S11_S12_S13.xlsx]

## Sheet: TabS11
Table S1. Chemical details of the samples, the standard material (CoCal-N) and the blank with calcium concentrations (measured by ICP-OES at the Insitute of Geology and Mineralogy, University of Cologne, Germany) and chlorine isotopic composition (measured at the Cologne AMS facility, Germany). All uncertainties represent 1-sigma deviations. Sample B580 was prepared as duplicate.
Sample ID	Height	m sample	m spike a	36Cl/35Cl b	± 36Cl/35Cl	36Cl/37Cl b	± 36Cl/37Cl	35Cl/37Cl b	± 35Cl/37Cl	Clnat AMS	± Clnat AMS	36Cl	± 36Cl	sample thickness	blank correction	Ca ICP-OES
	(cm)	(g)	(g)	(-)	(-)	(-)	(-)	(-)	(-)	(µg/g)	(µg/g)	(at/g rock)	(at/g rock)	(cm)	(%)	(%)
samples measured at Cologne AMS facility, Germany
BS-55	-55	39.6138	0.2276	9.72e-14	7.1928e-15	1.055e-12	7.807e-14	10.857	0.173712	7.0664	0.499464	70908.1	5394.4	2.3	0.0171731	39.2522
BS50	50	37.3713	0.2259	1.268e-13	8.6224e-15	1.355e-12	9.214e-14	10.732	0.171712	7.70854	0.532516	97977	6835.62	2.9	0.0132008	39.9676
BS200	200	38.0862	0.2263	1.547e-13	8.3538e-15	1.74e-12	9.396e-14	11.278	0.180448	6.4104	0.490786	115553	6402.97	2.8	0.011016	40.0174
BS400	400	39.2107	0.2266	1.766e-13	8.6534e-15	1.412e-12	6.9188e-14	8.018	0.128288	16.801	0.826482	152444	7779.08	3	0.00813385	38.9263
BS580	579	17.0476	0.2263	1.206e-13	6.5124e-15	1.665e-12	8.991e-14	13.834	0.221344	5.63071	0.852405	187213	10454.4	2.7	0.0151324	40.04
BS580-D	581	17.1926	0.2253	1.255e-13	6.526e-15	1.5e-12	7.8e-14	11.989	0.191824	11.2375	0.984794	201509	10857	2.7	0.0139496	40.0276
standard material measured at Cologne AMS facility, Germany c
CoCal-N 30/32	-	5.1166	0.2269	7.013e-13	2.31429e-14	1.393e-11	4.5969e-13	19.911	0.099555	-14.6776	1.31685	3.38029e+06	130364	-	-	-
blanks measured at Cologne AMS facility, Germany
CCC-B44		0	0.2264	1.912e-15	0	3.163e-14	2.34062e-15	16.565	6.77509	-	-	-	-	-	-	-
a Chlorine mass of 35Cl/37Cl spike added to the sample prior to dissolution. Spike concentration: mgCl/g solution = 6.712, 35Cl/37Cl = 19.891.
b The AMS machines were calibrated and normalized to three different concentrated standards (36Cl/Cl: 5.000 × 10−13, 1.600 × 10−12, and 1.000 × 10−11) from the NIST SRM 4943 material [Sharma et al., 1990].
c For quality assurance during the preparation we used the carbonatic CoCal-N standard material [Mechernich et al., 2018].

## Sheet: TabS12
Table S2. Chemical composition of the limestone of the BFSN
Ca: individual value for the respective samples was used in the modeling								Major and trace elements at site Bar_north of the Bar fault. These values were used as input parameters for code modelscarp.m provided in Schlagenhauf et al. [2010]. Measurements were done at Actlabs (Canada) using untreated material (in contrast to the Ca values reported in Table S1 which were obtained from leached sample material). FUS-ICP: fusion inductively coupled plasma; FUS-MS: fusion mass…
nonleached, ICP of leached aliquots
FUS-ICP, PGNAA, TD-ICP, GRAV, FUS-MS
Analyte Symbol	SiO2	Al2O3	Fe2O3	MnO	MgO	CaO	Na2O	K2O	TiO2	P2O5	B	Li	H2O	CO2	Total
Unit Symbol	%	%	%	%	%	%	%	%	%	%	ppm	ppm	%	%	%
Detection Limit	0.01	0.01	0.01	0.001	0.01	0.01	0.01	0.01	0.001	0.01	0.5	1	0.1		0.01
Analysis Method	FUS-ICP	FUS-ICP	FUS-ICP	FUS-ICP	FUS-ICP	FUS-ICP	FUS-ICP	FUS-ICP	FUS-ICP	FUS-ICP	PGNAA	TD-ICP	GRAV	FUS-ICP	FUS-ICP
Limestone of Bar fault plane
Pisia-15	0.07	0.04	0.04	0.003	1.1	55.25	< 0.01	< 0.01	0.002	0.01	< 2	< 1	-	43.43	99.94
Pisia 21	0.05	0.03	0.03	0.003	1.27	55.57	< 0.01	< 0.01	0.001	< 0.01	-	-	< 0.1	43.06	100
Pisia 26	0.05	0.03	0.03	0.003	0.95	55.24	< 0.01	< 0.01	0.002	0.01	4	< 1	-	43.22	99.55
Pisia 37	0.05	0.02	0.03	0.002	0.44	55.29	< 0.01	< 0.01	0.001	0.01	-	.	-	43.38	99.23
Pisia 80	0.06	0.04	0.12	0.003	0.39	56.59	< 0.01	< 0.01	0.002	0.02	2	< 1	-	43.6	100.8
Limestone Average	0.056	0.032	0.05	0.0028	0.83	55.588	0	0	0.0016	0.01	2	0	0.02	43.338	99.904
Colluvium at the base of site BFS_N at the Bar fault plane
Pisia soil -25cm	19.85	4.14	1.84	0.094	1.79	36.71	0.13	0.38	0.224	0.02	15.5	15	-	33.99	99.16
Pisia soil -15cm	25.31	3.18	1.41	0.09	2.59	34.52	0.1	0.32	0.168	0.03	19	14	-	31.07	98.78
Soil Average	22.58	3.66	1.625	0.092	2.19	35.615	0.115	0.35	0.196	0.025	17.25	14.5	-	32.53	98.97
Analyte Symbol	As	Ba	Be	Bi	Ce	Co	Cr	Cs	Cu	Dy	Er	Eu	Ga	Gd	Ge	Hf	Ho	In	La	Lu	Mo	Nb	Nd	Ni	Pb	Pr	Rb	Sb	Sm	Sn	Sr	Ta	Tb	Th	Tm	U	V	W	Y	Yb	Zn	Zr
Unit Symbol	ppm	ppm	ppm	ppm	ppm	ppm	ppm	ppm	ppm	ppm	ppm	ppm	ppm	ppm	ppm	ppm	ppm	ppm	ppm	ppm	ppm	ppm	ppm	ppm	ppm	ppm	ppm	ppm	ppm	ppm	ppm	ppm	ppm	ppm	ppm	ppm	ppm	ppm	ppm	ppm	ppm	ppm
Detection Limit	5	3	1	0.4	0.1	1	20	0.5	10	0.1	0.1	0.05	1	0.1	1	0.2	0.1	0.2	0.1	0.04	2	1	0.1	20	5	0.05	2	0.5	0.1	1	2	0.1	0.1	0.1	0.05	0.1	5	1	2	0.1	30	4
Analysis Method	FUS-MS	FUS-ICP	FUS-ICP	FUS-MS	FUS-MS	FUS-MS	FUS-MS	FUS-MS	FUS-MS	FUS-MS	FUS-MS	FUS-MS	FUS-MS	FUS-MS	FUS-MS	FUS-MS	FUS-MS	FUS-MS	FUS-MS	FUS-MS	FUS-MS	FUS-MS	FUS-MS	FUS-MS	FUS-MS	FUS-MS	FUS-MS	FUS-MS	FUS-MS	FUS-MS	FUS-ICP	FUS-MS	FUS-MS	FUS-MS	FUS-MS	FUS-MS	FUS-ICP	FUS-MS	FUS-ICP	FUS-MS	FUS-MS	FUS-ICP
Limestone of Bar fault plane
Pisia-15	< 5	4	< 1	< 0.4	0.3	< 1	< 20	< 0.5	< 10	< 0.1	< 0.1	< 0.05	< 1	< 0.1	< 1	< 0.2	< 0.1	< 0.2	0.2	< 0.04	< 2	< 1	0.1	< 20	< 5	< 0.05	< 2	< 0.5	< 0.1	< 1	92	< 0.1	< 0.1	< 0.1	< 0.05	0.3	7	< 1	6	< 0.1	< 30	< 4
Pisia 21	< 5	4	< 1	< 0.4	0.2	< 1	< 20	< 0.5	< 10	< 0.1	< 0.1	< 0.05	< 1	< 0.1	< 1	< 0.2	< 0.1	< 0.2	0.1	< 0.04	< 2	< 1	0.1	< 20	< 5	< 0.05	< 2	0.8	< 0.1	< 1	83	< 0.1	< 0.1	< 0.1	< 0.05	0.5	8	< 1	6	< 0.1	< 30	< 4
Pisia 26	< 5	35	< 1	< 0.4	0.3	< 1	< 20	< 0.5	< 10	< 0.1	< 0.1	< 0.05	< 1	< 0.1	< 1	< 0.2	< 0.1	< 0.2	0.2	< 0.04	< 2	< 1	0.2	< 20	< 5	< 0.05	< 2	< 0.5	< 0.1	< 1	91	< 0.1	< 0.1	< 0.1	< 0.05	0.3	7	< 1	6	< 0.1	< 30	< 4
Pisia 37	< 5	< 3	< 1	< 0.4	0.4	< 1	< 20	< 0.5	< 10	< 0.1	< 0.1	< 0.05	< 1	< 0.1	< 1	< 0.2	< 0.1	< 0.2	0.3	< 0.04	< 2	< 1	0.2	< 20	< 5	< 0.05	< 2	< 0.5	< 0.1	< 1	90	< 0.1	< 0.1	< 0.1	< 0.05	0.3	8	< 1	6	< 0.1	< 30	< 4
Pisia 80	19	4	< 1	< 0.4	0.2	< 1	< 20	< 0.5	< 10	< 0.1	< 0.1	< 0.05	< 1	< 0.1	< 1	< 0.2	< 0.1	< 0.2	0.1	< 0.04	< 2	< 1	< 0.1	< 20	< 5	< 0.05	< 2	< 0.5	< 0.1	< 1	93	< 0.1	< 0.1	< 0.1	< 0.05	0.3	7	< 1	6	< 0.1	< 30	< 4
Limestone Average	3.8	9.4	0	0	0.28	0	0	0	0	0	0	0	0	0	0	0	0	0	0.18	0	0	0	0.12	0	0	0	0	0.2	0	0	89.8	0	0	0	0	0.34	7.4	0	6	0	0	0
Colluvium at the base of site BFS_N at the Bar fault plane
Pisia soil -25cm	< 5	103	1	< 0.4	25.3	6	70	2.1	< 10	1.6	0.9	0.46	5	1.8	< 1	1.2	0.3	< 0.2	12.3	0.13	< 2	5	10.2	40	13	2.72	18	< 0.5	2	< 1	106	0.6	0.3	2.7	0.13	0.8	33	< 1	9	0.9	60	54
Pisia soil -15cm	< 5	83	< 1	< 0.4	21	5	70	2.3	10	1.4	0.8	0.35	4	1.5	< 1	1	0.3	< 0.2	10.4	0.1	< 2	4	8.9	40	11	2.32	18	0.6	1.8	< 1	87	0.4	0.2	2.5	0.11	0.8	26	2	8	0.7	< 30	43
Soil Average	0	93	1	0	23.15	5.5	70	2.2	10	1.5	0.85	0.405	4.5	1.65	0	1.1	0.3	0	11.35	0.115	0	4.5	9.55	40	12	2.52	18	0.55	1.9	0	96.5	0.5	0.25	2.6	0.12	0.8	29.5	2	8.5	0.8	45	48.5

## Sheet: TabS13
Table S3. Template with the sample details for data.rock.txt of the Matlab forward modeling code of Schlagen-hauf et al. (2010). The green columns were copied directly in the text-file.
	1	2	3	4	5	6	7	8	9	10	11	12	13	14	15	16	17	18	19	20	21	22	23	24	25	26	27	28	29	30	31	32	33	34	35	36	37	38	39	40	41	42	43	44	45	46	47	48	49
Site BFS_N	As	Ba	Be	Bi	Cd	Ce	Co	Cr	Cs	Cu	Dy	Er	Eu	Ga	Gd	Ge	Hf	Ho	In	La	Lu	Mo	Nb	Nd	Ni	Pb	Pr	Rb	Sb	Sm	Sn	Sr	Ta	Tb	Th	Tm	U	V	W	Y	Yb	Zn	Zr	SiO2 (Si)	Al2O3 (Al)	Fe2O3 (Fe)	MnO (Mn)	MgO (Mg)	CaO (Ca)
sample name	ppm	ppm	ppm	ppm	ppm	ppm	ppm	ppm	ppm	ppm	ppm	ppm	ppm	ppm	ppm	ppm	ppm	ppm	ppm	ppm	ppm	ppm	ppm	ppm	ppm	ppm	ppm	ppm	ppm	ppm	ppm	ppm	ppm	ppm	ppm	ppm	ppm	ppm	ppm	ppm	ppm	ppm	ppm	%	%	%	%	%	%
-55	0	90	0	0	0	6.125	2	10	1.2	17.5	1.325	0.7	0.315	0	1.45	0	0	0.275	0	7.375	0.1	0	0	5.975	15	0	1.4925	3	0.3	1.25	0	412.75	0	0.225	0.4	0.0975	0.375	9	0	12.5	0.625	0	7.5	5.01	0.4675	0.2725	0.11475	0.285	54.6333
50	0	90	0	0	0	6.125	2	10	1.2	17.5	1.325	0.7	0.315	0	1.45	0	0	0.275	0	7.375	0.1	0	0	5.975	15	0	1.4925	3	0.3	1.25	0	412.75	0	0.225	0.4	0.0975	0.375	9	0	12.5	0.625	0	7.5	5.01	0.4675	0.2725	0.11475	0.285	54.6333
200	0	90	0	0	0	6.125	2	10	1.2	17.5	1.325	0.7	0.315	0	1.45	0	0	0.275	0	7.375	0.1	0	0	5.975	15	0	1.4925	3	0.3	1.25	0	412.75	0	0.225	0.4	0.0975	0.375	9	0	12.5	0.625	0	7.5	5.01	0.4675	0.2725	0.11475	0.285	54.6333
400	0	90	0	0	0	6.125	2	10	1.2	17.5	1.325	0.7	0.315	0	1.45	0	0	0.275	0	7.375	0.1	0	0	5.975	15	0	1.4925	3	0.3	1.25	0	412.75	0	0.225	0.4	0.0975	0.375	9	0	12.5	0.625	0	7.5	5.01	0.4675	0.2725	0.11475	0.285	54.6333
580	0	90	0	0	0	6.125	2	10	1.2	17.5	1.325	0.7	0.315	0	1.45	0	0	0.275	0	7.375	0.1	0	0	5.975	15	0	1.4925	3	0.3	1.25	0	412.75	0	0.225	0.4	0.0975	0.375	9	0	12.5	0.625	0	7.5	5.01	0.4675	0.2725	0.11475	0.285	54.6333
580	0	90	0	0	0	6.125	2	10	1.2	17.5	1.325	0.7	0.315	0	1.45	0	0	0.275	0	7.375	0.1	0	0	5.975	15	0	1.4925	3	0.3	1.25	0	412.75	0	0.225	0.4	0.0975	0.375	9	0	12.5	0.625	0	7.5	5.01	0.4675	0.2725	0.11475	0.285	54.6333
[truncated: 18 more columns]
